# Supplementary material for: Architecture Insight of Bifidobacterial α-L-Fucosidases
Source: Preprints.org preprint supplement (doi:10.20944/preprints202106.0736.v1), 2021-06-30
Supplement: Supplementary file 1 [file Table 1 Supplemental.xlsx]

## Sheet: GH29
									NCBI CDD DATABASE†							INTERPRO DATABASE‡
	Group	Organism	Protein name	Size (Aminoacids)	Genbank	Signal peptide (region)	Transmembrane helices (region)	Activity	Conserved Domain	Hit type	PSSM-ID	From	To	E-Value	Accession	Conserved Domain	Hit type	From	To	Accession
	GH29-BifA	Bifidobacterium bifidum ATCC 29521 = JCM 1255 = DSM 20456	BBBF_1348	1487	BAQ98555.1	37-38	17-39,1459-1480		AfuC superfamily	superfamily	226195	511	988	2.0145e-37	cl34656	Glyco_Hydro_29	Family	504	1015	IPR000933
									F5_F8_type_C	specific	395611	1133	1262	5.75759e-14	cl23730	FA58C	Domain	1113	1269	IPR000421
		Bifidobacterium bifidum BF3	RY70_1497	1493	ALE11833.1	37-38	17-39,1465-1486		AfuC superfamily	superfamily	226195	511	988	4.63635e-36	cl34656	Glyco_Hydro_29	Family	500	1015	IPR000933
									F5_F8_type_C	specific	395611	1133	1262	2.10031e-13	cl23730	FA58C	Domain	1113	1269	IPR000421
		Bifidobacterium bifidum BGN4	BBB_1341	1493	AFL04933.1	37-38	17-39,1465-1486		AfuC superfamily	superfamily	226195	511	988	3.43066e-36	cl34656	Glyco_Hydro_29	Family	500	1015	IPR000933
									F5_F8_type_C	specific	395611	1133	1262	8.11894e-14	cl23730	FA58C	Domain	1113	1269	IPR000421
		Bifidobacterium bifidum CNCM I-4319	CNCMI4319_1323	1493	QTQ18758.1	37-38	17-39,1465-1486		AfuC superfamily	superfamily	226195	511	988	7.86391e-35	cl34656	Glyco_Hydro_29	Family	500	1015	IPR000933
									F5_F8_type_C	specific	395611	1133	1262	7.15717e-14	cl23730	FA58C	Domain	1113	1269	IPR000421
		Bifidobacterium bifidum HN002	JQN90_01120	1493	QRI58322.1	37-38	17-39,1465-1486		AfuC superfamily	superfamily	226195	511	988	3.43066e-36	cl34656	Glyco_Hydro_29	Family	500	1015	IPR000933
									F5_F8_type_C	specific	395611	1133	1262	8.11894e-14	cl23730	FA58C	Domain	1113	1269	IPR000421
		Bifidobacterium bifidum JCM 1254	α-1,3/4-L-fucosidase (AfcB;BbAfcB)	1493	BAH80310.1	37-38	17-39,1465-1486	Fucα1-3Glu; Fucα1-3/4GlcNAc (1)	AfuC superfamily	superfamily	226195	511	988	4.02593e-36	cl34656	Glyco_Hydro_29	Family	504	1015	IPR000933
									F5_F8_type_C	specific	395611	1133	1262	7.51281e-14	cl23730	FA58C	Domain	1113	1269	IPR000421
		Bifidobacterium bifidum LMG 13195 JCM 7004	BBJK_00483	1487	BBA47373.1	37-38	17-39,1459-1480		AfuC superfamily	superfamily	226195	511	988	1.51879e-36	cl34656	Glyco_Hydro_29	Family	504	1006	IPR000933
									F5_F8_type_C	specific	395611	1133	1262	1.91664e-13	cl23730	FA58C	Domain	1113	1269	IPR000421
		Bifidobacterium bifidum NCTC13001	NCTC13001_00892 (Neda_4)	1487	VEG17786.1	37-38	17-39,1459-1480		AfuC superfamily	superfamily	226195	511	988	2.0145e-37	cl34656	Glyco_Hydro_29	Family	504	1015	IPR000933
									F5_F8_type_C	specific	395611	1133	1262	5.75759e-14	cl23730	FA58C	Domain	1113	1269	IPR000421
		Bifidobacterium bifidum PRL2010	BBPR_1360	1487	ADP36408.1	37-38	17-39,1459-1480		AfuC superfamily	superfamily	226195	511	988	1.47649e-36	cl34656	Glyco_Hydro_29	Family	500	1015	IPR000933
									F5_F8_type_C	specific	395611	1133	1262	6.10258e-14	cl23730	FA58C	Domain	1113	1269	IPR000421
		Bifidobacterium bifidum S17	BBIF_1317	1499	ADO53522.1	37-38	17-39,1471-1492		AfuC superfamily	superfamily	226195	511	988	2.4642e-35	cl34656	Glyco_Hydro_29	Family	500	1015	IPR000933
									F5_F8_type_C	specific	395611	1133	1262	5.16839e-14	cl23730	FA58C	Domain	1113	1269	IPR000421
		Bifidobacterium bifidum S6	CJD48_03435	1493	AXM91280.1	37-38	17-39,1465-1486		AfuC superfamily	superfamily	226195	511	988	1.49828e-36	cl34656	Glyco_Hydro_29	Family	500	1015	IPR000933
									F5_F8_type_C	specific	395611	1133	1262	7.15717e-14	cl23730	FA58C	Domain	1113	1269	IPR000421
		Bifidobacterium bifidum TMC 3115	BBTM_01072	1488	BBA55614.1	37-38	17-39,1460-1481		AfuC superfamily	superfamily	226195	511	988	6.30752e-35	cl34656	Glyco_Hydro_29	Family	504	1015	IPR000933
									F5_F8_type_C	specific	395611	1133	1262	5.70604e-14	cl23730	FA58C	Domain	1113	1269	IPR000421
		Bifidobacterium bifidum TMC3108	1,3-1,4-α-L-fucosidase (AfcB)	1499	BBA57854.1	37-38	17-39,1471-1492		AfuC superfamily	superfamily	226195	511	988	1.43683e-36	cl34656	Glyco_Hydro_29	Family	504	1015	IPR000933
									F5_F8_type_C	specific	395611	1133	1262	1.7039e-14	cl23730	FA58C	Domain	1113	1269	IPR000421
	GH29-BifB	Bifidobacterium breve BR3	RY69_518	478	ALE12777.1				AfuC superfamily	superfamily	226195	19	471	6.38547e-63	cl34656	Glyco_Hydro_29	Family	12	475	IPR000933
		Bifidobacterium catenulatum subsp. kashiwanohense APCKJ1	BKKJ1_2070	478	QGM63573.1				AfuC superfamily	superfamily	226195	19	471	9.44929e-63	cl34656	Glyco_Hydro_29	Family	12	475	IPR000933
		Bifidobacterium catenulatum subsp. kashiwanohense JCM 15439 = DSM 21854	BBKW_1832	478	BAQ29967.1				AfuC superfamily	superfamily	226195	19	471	1.37597e-64	cl34656	Glyco_Hydro_29	Family	12	475	IPR000933
		Bifidobacterium longum BXY01	GS08_01715	478	AIF89910.1				AfuC superfamily	superfamily	226195	19	471	6.8973e-65	cl34656	Glyco_Hydro_29	Family	12	474	IPR000933
		Bifidobacterium longum subsp. longum JDM301	BLJ_0326	478	ADG99808.1				AfuC superfamily	superfamily	226195	19	471	6.8973e-65	cl34656	Glyco_Hydro_29	Family	12	474	IPR000933
		Bifidobacterium longum subsp. infantis ATCC 15697 = JCM 1222 = DSM 20088	α-1,3/1,4-L-fucosidase (BiAfcB;Blon_2336)	478	ACJ53394.1			Fucα1-3Glu; Fucα1-3/4GlcNAc (2)	AfuC superfamily	superfamily	226195	19	471	2.12174e-66	cl34656	Glyco_Hydro_29	Family	12	474	IPR000933
		Bifidobacterium longum subsp. infantis ATCC 15697 = JCM 1222 = DSM 20088	BLIJ_2413	478	BAJ69990.1				AfuC superfamily	superfamily	226195	19	471	2.12174e-66	cl34656	Glyco_Hydro_29	Family	12	474	IPR000933
		Bifidobacterium longum subsp. infantis Bi-26	EE567_010605	478	QKY14190.1				AfuC superfamily	superfamily	226195	19	471	1.57579e-66	cl34656	Glyco_Hydro_29	Family	12	474	IPR000933
		Bifidobacterium longum subsp. infantis BT1	RY67_476	478	ALE08539.1				AfuC superfamily	superfamily	226195	19	471	1.24733e-66	cl34656	Glyco_Hydro_29	Family	12	474	IPR000933
		Bifidobacterium longum subsp. infantis JCM 11347	BL1347_12485	478	QOL44541.1				AfuC superfamily	superfamily	226195	19	471	7.50959e-66	cl34656	Glyco_Hydro_29	Family	12	474	IPR000933
		Bifidobacterium longum subsp. infantis JCM 7009	BLI009_01395	478	QSP97854.1				AfuC superfamily	superfamily	226195	19	471	8.26269e-66	cl34656	Glyco_Hydro_29	Family	12	474	IPR000933
		Bifidobacterium longum subsp. infantis JCM 7010	BLI010_08105	478	QTB92446.1				AfuC superfamily	superfamily	226195	19	471	8.26269e-66	cl34656	Glyco_Hydro_29	Family	12	474	IPR000933
		Bifidobacterium longum subsp. infantis JCM 7011	BLI011_01355	478	QSZ18101.1				AfuC superfamily	superfamily	226195	19	471	8.26269e-66	cl34656	Glyco_Hydro_29	Family	12	474	IPR000933
		Bifidobacterium longum subsp. infantis NCTC11817	NCTC11817_02482	478	VEG44484.1				AfuC superfamily	superfamily	226195	19	471	2.12174e-66	cl34656	Glyco_Hydro_29	Family	12	474	IPR000933
		Bifidobacterium scardovii JCM 12489 = DSM 13734	BBSC_1794	483	BAQ31874.1				AfuC superfamily	superfamily	226195	7	477	1.58919e-54	cl34656	Glyco_Hydro_29	Family	10	478	IPR000933
	GH29-BifC	Bifidobacterium actinocoloniiforme DSM 22766	AB656_02675	342	AKV55318.1				AmyAc_family superfamily	superfamily	422958	6	336	2.64469e-62	cl38930	Glyco_Hydro_29	Family	1	340	IPR000933
																FUC_metazoa_typ	Family	1	337	IPR016286
		Bifidobacterium breve NRBB50	NRBB50_0244	449	AUD75916.1				AmyAc_family superfamily	superfamily	422958	19	392	2.45742e-96	cl38930	Glyco_Hydro_29	Family	8	403	IPR000933
																FUC_metazoa_typ	Family	3	414	IPR016286
		Bifidobacterium catenulatum subsp. kashiwanohense APCKJ1	BKKJ1_1887	449	QGM63397.1				AmyAc_family superfamily	superfamily	422958	19	392	2.06303e-97	cl38930	Glyco_Hydro_29	Family	8	403	IPR000933
																FUC_metazoa_typ	Family	3	414	IPR016286
		Bifidobacterium catenulatum subsp. kashiwanohense JCM 15439 = DSM 21854	BBKW_1714	449	BAQ29849.1				AmyAc_family superfamily	superfamily	422958	19	392	2.06303e-97	cl38930	Glyco_Hydro_29	Family	8	403	IPR000933
																FUC_metazoa_typ	Family	3	414	IPR016286
		Bifidobacterium longum subsp. infantis ATCC 15697 = JCM 1222 = DSM 20088	α-L-fucosidase (Blon_0248)	449	ACJ51376.1			Fucα1-2Gal/3/6GlcNAc; pNP-fucose (3)	AmyAc_family superfamily	superfamily	422958	19	392	1.97934e-96	cl38930	Glyco_Hydro_29	Family	8	403	IPR000933
																FUC_metazoa_typ	Family	3	414	IPR016286
		Bifidobacterium longum subsp. infantis ATCC 15697 = JCM 1222 = DSM 20088	α-L-fucosidase (Blon_0426)	449	ACJ51546.1			Fucα1-2Gal/3/6GlcNAc; pNP-fucose (3)	AmyAc_family superfamily	superfamily	422958	19	392	1.08e-101	cl38930	Glyco_Hydro_29	Family	8	403	IPR000933
																FUC_metazoa_typ	Family	3	414	IPR016286
		Bifidobacterium longum subsp. infantis ATCC 15697 = JCM 1222 = DSM 20088	BLIJ_0254	449	BAJ67848.1				AmyAc_family superfamily	superfamily	422958	19	392	1.97934e-96	cl38930	Glyco_Hydro_29	Family	8	403	IPR000933
																FUC_metazoa_typ	Family	3	414	IPR016286
		Bifidobacterium longum subsp. infantis ATCC 15697 = JCM 1222 = DSM 20088	BLIJ_0435	449	BAJ68029.1				AmyAc_family superfamily	superfamily	422958	19	392	1.08e-101	cl38930	Glyco_Hydro_29	Family	8	403	IPR000933
																FUC_metazoa_typ	Family	3	414	IPR016286
		Bifidobacterium longum subsp. infantis Bi-26	EE567_002130	449	QKY12785.1				AmyAc_family superfamily	superfamily	422958	19	392	1.57407e-97	cl38930	Glyco_Hydro_29	Family	8	403	IPR000933
																FUC_metazoa_typ	Family	3	414	IPR016286
		Bifidobacterium longum subsp. infantis Bi-26	EE567_001255	449	QKY12637.1				AmyAc_family superfamily	superfamily	422958	19	392	2.88523e-97	cl38930	Glyco_Hydro_29	Family	8	403	IPR000933
																FUC_metazoa_typ	Family	3	414	IPR016286
		Bifidobacterium longum subsp. infantis BT1	RY67_959	449	ALE09003.1				AmyAc_family superfamily	superfamily	422958	21	354	1.09071e-97	cl38930	Glyco_Hydro_29	Family	8	403	IPR000933
																FUC_metazoa_typ	Family	3	414	IPR016286
		Bifidobacterium longum subsp. infantis BT1	RY67_1129	449	ALE09165.1				AmyAc_family superfamily	superfamily	422958	19	392	3.78142e-97	cl38930	Glyco_Hydro_29	Family	8	403	IPR000933
																FUC_metazoa_typ	Family	3	414	IPR016286
		Bifidobacterium longum subsp. infantis JCM 11347	BL1347_03565	449	QOL45132.1				AmyAc_family superfamily	superfamily	422958	19	392	4.43766e-98	cl38930	Glyco_Hydro_29	Family	8	403	IPR000933
																FUC_metazoa_typ	Family	3	414	IPR016286
		Bifidobacterium longum subsp. infantis JCM 7009	BLI009_04650	449	QSP98396.1				AmyAc_family superfamily	superfamily	422958	19	392	1.28154e-97	cl38930	Glyco_Hydro_29	Family	8	403	IPR000933
																FUC_metazoa_typ	Family	3	414	IPR016286
		Bifidobacterium longum subsp. infantis JCM 7010	BLI010_04855	449	QTB93831.1				AmyAc_family superfamily	superfamily	422958	19	392	1.28154e-97	cl38930	Glyco_Hydro_29	Family	8	403	IPR000933
																FUC_metazoa_typ	Family	3	414	IPR016286
		Bifidobacterium longum subsp. infantis JCM 7011	BLI011_04615	449	QSZ18645.1				AmyAc_family superfamily	superfamily	422958	19	392	1.28154e-97	cl38930	Glyco_Hydro_29	Family	8	403	IPR000933
																FUC_metazoa_typ	Family	3	414	IPR016286
		Bifidobacterium longum subsp. infantis NCTC11817	NCTC11817_00256	449	VEG40009.1				AmyAc_family superfamily	superfamily	422958	19	392	1.97934e-96	cl38930	Glyco_Hydro_29	Family	8	403	IPR000933
																FUC_metazoa_typ	Family	3	414	IPR016286
		Bifidobacterium longum subsp. infantis NCTC11817	NCTC11817_00442	449	VEG40377.1				AmyAc_family superfamily	superfamily	422958	19	392	1.08e-101	cl38930	Glyco_Hydro_29	Family	8	403	IPR000933
																FUC_metazoa_typ	Family	3	414	IPR016286
	GH29-BifD	Bifidobacterium asteroides DSM 20089	BA20089_00180	493	ATO42175.1				Alpha_L_fucos	specific	214829	17	434	1.90564e-119	cl38930	Glyco_Hydro_29	Family	11	435	IPR000933
																FUC_metazoa_typ	Family	114	379	IPR016286
		Bifidobacterium asteroides PRL2011	BAST_0184	507	AFU70782.1				Alpha_L_fucos	specific	214829	31	448	1.04477e-119	cl38930	Glyco_Hydro_29	Family	25	449	IPR000933
																FUC_metazoa_typ	Family	128	393	IPR016286
		Bifidobacterium choerinum FMB-1	NCTC11816_02090	493	VEG24688.1				Alpha_L_fucos	specific	214829	11	386	4.09454e-113	cl38930	Glyco_Hydro_29	Family	8	434	IPR000933
																FUC_metazoa_typ	Family	111	377	IPR016286
		Bifidobacterium dentium Bd1	BcFMB_01900	497	ATU21130.1				Alpha_L_fucos	specific	214829	11	420	1.60788e-120	cl38930	Glyco_Hydro_29	Family	6	426	IPR000933
																FUC_metazoa_typ	Family	111	376	IPR016286
		Bifidobacterium dentium E7	BDP_2152	497	ADB10709.1				Alpha_L_fucos	specific	214829	11	420	1.9582e-123	cl38930	Glyco_Hydro_29	Family	6	426	IPR000933
																FUC_metazoa_typ	Family	111	376	IPR016286
		Bifidobacterium dentium JCM 1195 = DSM 20436	J7M36_09815	497	QTL79634.1				Alpha_L_fucos	specific	214829	11	420	1.60788e-120	cl38930	Glyco_Hydro_29	Family	6	426	IPR000933
																FUC_metazoa_typ	Family	111	376	IPR016286
		Bifidobacterium dentium N8	BBDE_2021	497	BAQ28015.1				Alpha_L_fucos	specific	214829	11	420	4.05342e-122	cl38930	Glyco_Hydro_29	Family	6	426	IPR000933
																FUC_metazoa_typ	Family	111	376	IPR016286
		Bifidobacterium dentium NCTC11816	J7M35_10120	497	QTL77771.1				Alpha_L_fucos	specific	214829	11	420	1.60788e-120	cl38930	Glyco_Hydro_29	Family	6	426	IPR000933
																FUC_metazoa_typ	Family	111	376	IPR016286
		Bifidobacterium eulemuris DSM 100216	BE0216_06710	489	QOL32183.1				Alpha_L_fucos	specific	214829	11	431	6.06805e-126	cl38930	Glyco_Hydro_29	Family	6	469	IPR000933
																FUC_metazoa_typ	Family	3	479	IPR016286
		Bifidobacterium imperatoris JCM 32708	BLI708_02340	494	QSY58179.1				Alpha_L_fucos	specific	214829	11	422	1.22322e-125	cl38930	Glyco_Hydro_29	Family	5	471	IPR000933
		Bifidobacterium lemurum DSM 28807	BL8807_03220	489	QOL34915.1				Alpha_L_fucos	specific	214829	11	431	8.33249e-124	cl38930	Glyco_Hydro_29	Family	6	432	IPR000933
		Bifidobacterium pseudolongum UMB-MBP-01	BPSOL_1662	489	ASW23680.1				Alpha_L_fucos	specific	214829	11	431	1.78065e-119	cl38930	Glyco_Hydro_29	Family	6	433	IPR000933
																FUC_metazoa_typ	Family	111	376	IPR016286
		Bifidobacterium pullorum subsp. gallinarum CACC 514	ESN35_10285	489	QAY33951.1				Alpha_L_fucos	specific	214829	12	432	2.13394e-127	cl38930	Glyco_Hydro_29	Family	8	434	IPR000933
																FUC_metazoa_typ	Family	3	449	IPR016286
		Bifidobacterium saguini DSMZ 23967	BSD967_07185	491	QTB90137.1				Alpha_L_fucos	specific	214829	11	429	3.07386e-121	cl38930	Glyco_Hydro_29	Family	5	458	IPR000933
		Bifidobacterium scardovii JCM 12489 = DSM 13734	BBSC_1774	431	BAQ31854.1				Alpha_L_fucos	specific	214829	11	366	1.04584e-109	cl38930	Glyco_Hydro_29	Family	1	379	IPR000933
																FUC_metazoa_typ	Family	4	416	IPR016286
	Characterized fucosidases in bold type
	(1) Ashida et al., 2009 [28]
	(2) Sela et al., 2012 [21]
	(3) Ashida et al., 2020 [33]
	† Lu et al., 2020 [49]
	‡ Blum et al., 2021 [50]
