# Supplementary material for: Architecture Insight of Bifidobacterial α-L-Fucosidases
Source: Preprints.org preprint supplement (doi:10.20944/preprints202106.0736.v1), 2021-06-30
Supplement: Supplementary file 2 [file Table 2 Supplemental.xlsx]

## Sheet: GH95
										NCBI CDD DATABASE†							INTERPRO DATABASE‡
		Group	Organism	Protein name	Size (Aminoacids)	Genbank	Signal peptide (region)	Transmembrane helices (region)	Activity	Conserved Domain	Hit type	PSSM-ID	From	To	E-Value	Accession	Conserved Domain	Hit type	From	To	Accession
		GH95-BifA	Bifidobacterium bifidum ATCC 29521 = JCM 1255 = DSM 20456	BBBF_0199	1954	BAQ97406.1	36-37	8-30,1924-1946		Glyco_hyd_65N_2	specific	405224	590	856	2.6673e-72	cl22392	Ig-like_bact	Domain	497	564	IPR022038
										YjdB	specific	227779	1488	1804	2.76047e-20	cl35007	GH95_N_dom	Domain	590	856	IPR027414
										YjdB	specific	227779	1339	1624	7.36994e-19	cl35007	BIG_2	Domain	1473	1809	IPR003343
			Bifidobacterium bifidum BF3	RY70_253	1954	ALE10636.1	36-37	8-30,1927-1948		Glyco_hyd_65N_2	specific	405224	590	856	6.48955e-71	cl22392	Ig-like_bact	Domain	497	564	IPR022038
										YjdB	specific	227779	1488	1804	3.76376e-20	cl35007	GH95_N_dom	Domain	590	856	IPR027414
										YjdB	specific	227779	1339	1624	9.7167e-21	cl35007	BIG_2	Domain	1473	1809	IPR003343
			Bifidobacterium bifidum BGN4	BBB_0176	1959	AFL03772.1	33-34	12-34,1929-1951		Glyco_hyd_65N_2	specific	405224	595	861	3.57434e-71	cl22392	Ig-like_bact	Domain	502	569	IPR022038
										YjdB	specific	227779	1493	1809	4.91028e-20	cl35007	GH95_N_dom	Domain	595	861	IPR027414
										YjdB	specific	227779	1344	1629	1.9334e-20	cl35007	BIG_2	Domain	1478	1814	IPR003343
			Bifidobacterium bifidum CNCM I-4319	CNCMI4319_0164	1959	QTQ17622.1	33-34	12-34,1929-1951		Glyco_hyd_65N_2	specific	405224	595	861	2.20463e-71	cl22392	Ig-like_bact	Domain	502	569	IPR022038
										YjdB	specific	227779	1493	1809	1.33015e-20	cl35007	GH95_N_dom	Domain	595	861	IPR027414
										YjdB	specific	227779	1344	1629	1.06529e-18	cl35007	BIG_2	Domain	1478	1814	IPR003343
			Bifidobacterium bifidum HN002	JQN90_04555	1959	QRI58870.1	33-34	12-34,1929-1951		Glyco_hyd_65N_2	specific	405224	595	861	3.57434e-71	cl22392	Ig-like_bact	Domain	502	569	IPR022038
										YjdB	specific	227779	1493	1809	4.91028e-20	cl35007	GH95_N_dom	Domain	595	861	IPR027414
										YjdB	specific	227779	1344	1629	1.9334e-20	cl35007	BIG_2	Domain	1478	1814	IPR003343
			Bifidobacterium bifidum JCM 1254	α-1,2-L-fucosidase (AfcA;AfuA;BbAfcA)	1959	AAQ72464.1	33-34	12-34,1929-1951	Fucα1,2 Gal (1)	Glyco_hyd_65N_2	specific	405224	595	861	2.42833e-71	cl22392	Ig-like_bact	Domain	502	569	IPR022038
										YjdB	specific	227779	1595	1809	6.20966e-20	cl35007	GH95_N_dom	Domain	595	861	IPR027414
										YjdB superfamily	superfamily	227779	1344	1629	5.38108e-16	cl35007	BIG_2	Domain	1478	1814	IPR003343
			Bifidobacterium bifidum LMG 13195 JCM 7004	BBJK_01721	1959	BBA48185.1	36-37	8-30,1924-1946		Glyco_hyd_65N_2	specific	405224	590	856	2.26318e-71	cl22392	Ig-like_bact	Domain	497	564	IPR022038
										YjdB	specific	227779	1488	1804	1.25354e-20	cl35007	GH95_N_dom	Domain	590	856	IPR027414
										YjdB	specific	227779	1339	1624	9.94747e-19	cl35007	BIG_2	Domain	1473	1809	IPR003343
			Bifidobacterium bifidum NCTC13001	NCTC13001_00188 (CgkA)	1959	VEG16445.1	33-34	12-34,1929-1951		Glyco_hyd_65N_2	specific	405224	595	861	2.42833e-71	cl22392	Ig-like_bact	Domain	502	569	IPR022038
										YjdB	specific	227779	1493	1809	2.12809e-20	cl35007	GH95_N_dom	Domain	595	861	IPR027414
										YjdB	specific	227779	1344	1629	5.52743e-19	cl35007	BIG_2	Domain	1478	1814	IPR003343
			Bifidobacterium bifidum PRL2010	BBPR_0193	1959	ADP35322.1	33-34	12-34,1929-1951		Glyco_hyd_65N_2	specific	405224	595	861	3.57434e-71	cl22392	Ig-like_bact	Domain	502	569	IPR022038
										YjdB	specific	227779	1493	1809	9.30571e-21	cl35007	GH95_N_dom	Domain	595	861	IPR027414
										YjdB	specific	227779	1344	1629	4.91028e-20	cl35007	BIG_2	Domain	1478	1814	IPR003343
			Bifidobacterium bifidum S17	BBIF_0215	1959	ADO52420.1	33-34	12-34,1929-1951		Glyco_hyd_65N_2	specific	405224	595	861	3.86166e-71	cl22392	Ig-like_bact	Domain	502	569	IPR022038
										YjdB	specific	227779	1493	1809	3.60157e-20	cl35007	GH95_N_dom	Domain	595	861	IPR027414
										YjdB	specific	227779	1344	1629	2.42164e-19	cl35007	BIG_2	Domain	1478	1814	IPR003343
			Bifidobacterium bifidum S6	CJD48_09790	1959	AXM92304.1	33-34	12-34,1929-1951		Glyco_hyd_65N_2	specific	405224	595	861	2.08042e-71	cl22392	Ig-like_bact	Domain	502	569	IPR022038
										YjdB	specific	227779	1493	1809	1.05051e-19	cl35007	GH95_N_dom	Domain	595	861	IPR027414
										YjdB	specific	227779	1344	1629	1.37194e-18	cl35007	BIG_2	Domain	1478	1814	IPR003343
			Bifidobacterium bifidum TMC 3115	BBTM_02097	1953	BBA56317.1	35-36	7-29,1923-1945		Glyco_hyd_65N_2	specific	405224	589	855	3.52817e-71	cl22392	Ig-like_bact	Domain	496	568	IPR022038
										YjdB	specific	227779	1487	1803	1.31309e-20	cl35007	GH95_N_dom	Domain	589	855	IPR027414
										YjdB	specific	227779	1338	1623	6.86126e-20	cl35007	BIG_2	Domain	1472	1808	IPR003343
			Bifidobacterium bifidum TMC3108	1,2-α-L-fucosidase (AfcA)	1959	BBA57853.1	33-34	12-34,1929-1951		Glyco_hyd_65N_2	specific	405224	595	861	4.2948e-72	cl22392	Ig-like_bact	Domain	502	569	IPR022038
										YjdB	specific	227779	1344	1629	5.44446e-21	cl35007	GH95_N_dom	Domain	595	861	IPR027414
										YjdB	specific	227779	1493	1809	4.03131e-20	cl35007	BIG_2	Domain	1478	1814	IPR003343
		Unclustered	Bifidobacterium imperatoris JCM 32708	BLI708_06065	1319	QSY56848.1	34-35			Big_3 superfamily	superfamily	400072	272	343	0.000185	cl06524	Ig-like_bact	Domain	274	343	IPR022038
										Glyco_hyd_65N_2	specific	405224	361	629	7.13564e-64	cl22392	GH95_N_dom	Domain	361	629	IPR027414
										Bac_rhamnosid6H superfamily	superfamily	421719	826	942	0.000125	cl29051
			Bifidobacterium saguini DSMZ 23967	BSD967_03930	1423	QTB91571.1	34-35	14-36,1390-1412		Big_3 superfamily	superfamily	400072	272	343	0.000409	cl06524	Ig-like_bact	Domain	274	343	IPR022038
										Glyco_hyd_65N_2	specific	405224	361	629	2.98434e-67	cl22392	GH95_N_dom	Domain	361	629	IPR027414
										YjdB superfamily	superfamily	227779	1235	1308	5.77671e-08	cl35007	BIG_2	Domain	1243	1318	IPR003343
										Bac_rhamnosid6H superfamily	superfamily	421719	826	942	0.000122	cl29051
		GH95-BifB	Bifidobacterium breve 017W439	BB017W439_1382	783	AUD95682.1				Glyco_hyd_65N_2 superfamily	superfamily	405224	3	249	6.22951e-31	cl22392	Alpha-L-Fuco	Family	1	769	IPR016518
			Bifidobacterium breve 082W48	BB082W48_1368	783	AUD97592.1				Glyco_hyd_65N_2 superfamily	superfamily	405224	3	249	9.22332e-32	cl22392	Alpha-L-Fuco	Family	1	771	IPR016518
			Bifidobacterium breve 12L	B12L_1234	783	AHJ15975.1				Glyco_hyd_65N_2 superfamily	superfamily	405224	3	249	4.90778e-32	cl22392	Alpha-L-Fuco	Family	1	771	IPR016518
			Bifidobacterium breve 139W423	BB139W423_1449	783	AUD99560.1				Glyco_hyd_65N_2 superfamily	superfamily	405224	3	249	1.46938e-31	cl22392	Alpha-L-Fuco	Family	1	771	IPR016518
			Bifidobacterium breve 180W83	BB180W83_1353	783	AUE01477.1				Glyco_hyd_65N_2 superfamily	superfamily	405224	3	249	5.93492e-31	cl22392	Alpha-L-Fuco	Family	1	769	IPR016518
			Bifidobacterium breve 215W447a	BB215W447A_1620	783	AUE03628.1				Glyco_hyd_65N_2 superfamily	superfamily	405224	3	249	3.44921e-31	cl22392	Alpha-L-Fuco	Family	1	771	IPR016518
			Bifidobacterium breve 689b	B689b_1317	783	AHJ23321.1				Glyco_hyd_65N_2 superfamily	superfamily	405224	3	249	3.76363e-31	cl22392	Alpha-L-Fuco	Family	1	769	IPR016518
			Bifidobacterium breve ACS-071-V-Sch8b	HMPREF9228_0580	783	AEF27120.1				Glyco_hyd_65N_2 superfamily	superfamily	405224	3	249	7.67143e-33	cl22392	Alpha-L-Fuco	Family	1	771	IPR016518
			Bifidobacterium breve BR3	RY69_519	783	ALE12778.1				Glyco_hyd_65N_2 superfamily	superfamily	405224	3	249	3.59373e-30	cl22392	Alpha-L-Fuco	Family	1	771	IPR016518
			Bifidobacterium breve CNCM I-4321	CNCMI4321_1457	783	AUE05668.1				Glyco_hyd_65N_2 superfamily	superfamily	405224	3	249	4.90778e-32	cl22392	Alpha-L-Fuco	Family	1	771	IPR016518
			Bifidobacterium breve DRBB26	DRBB26_1408	783	AUD89535.1				Glyco_hyd_65N_2 superfamily	superfamily	405224	3	249	3.20127e-32	cl22392	Alpha-L-Fuco	Family	1	771	IPR016518
			Bifidobacterium breve DRBB27	DRBB27_1483	783	AUD91595.1				Glyco_hyd_65N_2 superfamily	superfamily	405224	3	249	2.95747e-29	cl22392	Alpha-L-Fuco	Family	1	771	IPR016518
			Bifidobacterium breve DRBB28	DRBB28_1531	783	AUD93716.1				Glyco_hyd_65N_2 superfamily	superfamily	405224	3	249	5.93492e-31	cl22392	Alpha-L-Fuco	Family	1	769	IPR016518
			Bifidobacterium breve DRBB29	DRBB29_1484	783	AUE19026.1				Glyco_hyd_65N_2 superfamily	superfamily	405224	3	249	2.95747e-29	cl22392	Alpha-L-Fuco	Family	1	771	IPR016518
			Bifidobacterium breve DRBB30	DRBB30_1455	783	AUE21091.1				Glyco_hyd_65N_2 superfamily	superfamily	405224	3	249	4.90778e-32	cl22392	Alpha-L-Fuco	Family	1	771	IPR016518
			Bifidobacterium breve DSM 20213 = JCM 1192	BBBR_1349	783	BAR00388.1				Glyco_hyd_65N_2 superfamily	superfamily	405224	3	249	4.76689e-32	cl22392	Alpha-L-Fuco	Family	1	769	IPR016518
			Bifidobacterium breve FDAARGOS_561	EGX97_07215	783	AYZ89268.1				Glyco_hyd_65N_2 superfamily	superfamily	405224	3	249	4.76689e-32	cl22392	Alpha-L-Fuco	Family	1	769	IPR016518
			Bifidobacterium breve IDCC4401	GEO35_02990	783	QFV12751.1				Glyco_hyd_65N_2 superfamily	superfamily	405224	3	249	1.04633e-31	cl22392	Alpha-L-Fuco	Family	1	771	IPR016518
			Bifidobacterium breve JCM 7017	B7017_1259	783	AHJ17750.1				Glyco_hyd_65N_2 superfamily	superfamily	405224	3	249	2.30084e-32	cl22392	Alpha-L-Fuco	Family	1	770	IPR016518
			Bifidobacterium breve JCM 7019	B7019_1470	783	AHJ19655.1				Glyco_hyd_65N_2 superfamily	superfamily	405224	3	249	3.55099e-31	cl22392	Alpha-L-Fuco	Family	1	771	IPR016518
			Bifidobacterium breve JR01	D3H49_03470	783	QHP51115.1				Glyco_hyd_65N_2 superfamily	superfamily	405224	3	249	4.5246e-32	cl22392	Alpha-L-Fuco	Family	1	771	IPR016518
			Bifidobacterium breve JSRL01	GFJ40_06720	783	QFZ80540.1				Glyco_hyd_65N_2 superfamily	superfamily	405224	3	249	4.06706e-31	cl22392	Alpha-L-Fuco	Family	1	771	IPR016518
			Bifidobacterium breve LMC520	BBL520_07300	783	AQM43364.1				Glyco_hyd_65N_2 superfamily	superfamily	405224	3	249	3.59698e-32	cl22392	Alpha-L-Fuco	Family	1	771	IPR016518
			Bifidobacterium breve lw01	EH245_06890	783	AZI16918.1				Glyco_hyd_65N_2 superfamily	superfamily	405224	3	249	1.06129e-30	cl22392	Alpha-L-Fuco	Family	1	771	IPR016518
			Bifidobacterium breve NCFB 2258	B2258_1264	783	AHJ21459.1				Glyco_hyd_65N_2 superfamily	superfamily	405224	3	249	3.10934e-32	cl22392	Alpha-L-Fuco	Family	1	770	IPR016518
			Bifidobacterium breve NCTC11815	NCTC11815_01390	783	VEG22092.1				Glyco_hyd_65N_2 superfamily	superfamily	405224	3	249	4.76689e-32	cl22392	Alpha-L-Fuco	Family	1	769	IPR016518
			Bifidobacterium breve NRBB01	NRBB01_1360	783	AUD67568.1				Glyco_hyd_65N_2 superfamily	superfamily	405224	3	249	4.76689e-32	cl22392	Alpha-L-Fuco	Family	1	769	IPR016518
			Bifidobacterium breve NRBB02	NRBB02_1298	783	AUD69398.1				Glyco_hyd_65N_2 superfamily	superfamily	405224	3	249	4.5246e-32	cl22392	Alpha-L-Fuco	Family	1	771	IPR016518
			Bifidobacterium breve NRBB04	NRBB04_1266	783	AUD71232.1				Glyco_hyd_65N_2 superfamily	superfamily	405224	3	249	3.10934e-32	cl22392	Alpha-L-Fuco	Family	1	770	IPR016518
			Bifidobacterium breve NRBB08	NRBB08_1299	783	AUE07609.1				Glyco_hyd_65N_2 superfamily	superfamily	405224	3	249	4.5246e-32	cl22392	Alpha-L-Fuco	Family	1	771	IPR016518
			Bifidobacterium breve NRBB09	NRBB09_1297	783	AUD73141.1				Glyco_hyd_65N_2 superfamily	superfamily	405224	3	249	3.42648e-32	cl22392	Alpha-L-Fuco	Family	1	771	IPR016518
			Bifidobacterium breve NRBB11	NRBB11_1314	783	AUD75044.1				Glyco_hyd_65N_2 superfamily	superfamily	405224	3	249	3.42648e-32	cl22392	Alpha-L-Fuco	Family	1	771	IPR016518
			Bifidobacterium breve NRBB18	NRBB18_1301	783	AUE09483.1				Glyco_hyd_65N_2 superfamily	superfamily	405224	3	249	4.5246e-32	cl22392	Alpha-L-Fuco	Family	1	771	IPR016518
			Bifidobacterium breve NRBB19	NRBB19_1302	783	AUE11360.1				Glyco_hyd_65N_2 superfamily	superfamily	405224	3	249	4.5246e-32	cl22392	Alpha-L-Fuco	Family	1	771	IPR016518
			Bifidobacterium breve NRBB20	NRBB20_1307	783	AUE13234.1				Glyco_hyd_65N_2 superfamily	superfamily	405224	3	249	4.5246e-32	cl22392	Alpha-L-Fuco	Family	1	771	IPR016518
			Bifidobacterium breve NRBB27	NRBB27_1299	783	AUE15107.1				Glyco_hyd_65N_2 superfamily	superfamily	405224	3	249	4.5246e-32	cl22392	Alpha-L-Fuco	Family	1	771	IPR016518
			Bifidobacterium breve NRBB49	NRBB49_1299	783	AUE16976.1				Glyco_hyd_65N_2 superfamily	superfamily	405224	3	249	4.5246e-32	cl22392	Alpha-L-Fuco	Family	1	771	IPR016518
			Bifidobacterium breve NRBB50	NRBB50_1489	783	AUD77111.1				Glyco_hyd_65N_2 superfamily	superfamily	405224	3	249	1.46938e-31	cl22392	Alpha-L-Fuco	Family	1	771	IPR016518
			Bifidobacterium breve NRBB51	NRBB51_1366	783	AUD81455.1				Glyco_hyd_65N_2 superfamily	superfamily	405224	3	249	4.90778e-32	cl22392	Alpha-L-Fuco	Family	1	771	IPR016518
			Bifidobacterium breve NRBB52	NRBB52_1366	783	AUD83426.1				Glyco_hyd_65N_2 superfamily	superfamily	405224	3	249	5.93492e-31	cl22392	Alpha-L-Fuco	Family	1	769	IPR016518
			Bifidobacterium breve NRBB56	NRBB56_1379	783	AUD85412.1				Glyco_hyd_65N_2 superfamily	superfamily	405224	3	249	1.49817e-31	cl22392	Alpha-L-Fuco	Family	1	771	IPR016518
			Bifidobacterium breve NRBB57	NRBB57_1578	783	AUD87574.1				Glyco_hyd_65N_2 superfamily	superfamily	405224	3	249	3.13843e-30	cl22392	Alpha-L-Fuco	Family	1	771	IPR016518
			Bifidobacterium breve S27	BS27_1311	783	AHJ25106.1				Glyco_hyd_65N_2 superfamily	superfamily	405224	3	249	4.5246e-32	cl22392	Alpha-L-Fuco	Family	1	771	IPR016518
			Bifidobacterium breve UCC2003	Bbr_1288	783	ABE95964.1				Glyco_hyd_65N_2 superfamily	superfamily	405224	3	249	1.04633e-31	cl22392	Alpha-L-Fuco	Family	1	771	IPR016518
			Bifidobacterium catenulatum subsp. kashiwanohense APCKJ1	BKKJ1_2069	783	QGM63572.1				Glyco_hyd_65N_2 superfamily	superfamily	405224	3	249	8.92e-35	cl22392	Alpha-L-Fuco	Family	1	774	IPR016518
			Bifidobacterium catenulatum subsp. kashiwanohense JCM 15439 = DSM 21854	BBKW_1831	783	BAQ29966.1				Glyco_hyd_65N_2 superfamily	superfamily	405224	3	249	3.95e-35	cl22392	Alpha-L-Fuco	Family	1	773	IPR016518
			Bifidobacterium kashiwanohense PV20-2	AH68_10220	783	AIZ15343.1				Glyco_hyd_65N_2 superfamily	superfamily	405224	3	242	1.4552e-32	cl22392	Alpha-L-Fuco	Family	1	769	IPR016518
			Bifidobacterium longum BXY01	GS08_01720	783	AIF89911.1				Glyco_hyd_65N_2 superfamily	superfamily	405224	3	242	6.47567e-31	cl22392	Alpha-L-Fuco	Family	1	770	IPR016518
			Bifidobacterium longum subsp. longum JDM301	BLJ_0327	783	ADG99809.1				Glyco_hyd_65N_2 superfamily	superfamily	405224	3	242	6.47567e-31	cl22392	Alpha-L-Fuco	Family	1	770	IPR016518
			Bifidobacterium longum subsp. longum KCTC 5915	BL5915_03920	783	QOL55932.1				Glyco_hyd_65N_2 superfamily	superfamily	405224	3	249	1.28347e-28	cl22392	Alpha-L-Fuco	Family	1	770	IPR016518
			Bifidobacterium pseudocatenulatum DSM 20438 = JCM 1200 = LMG 10505	BBPC_1770	783	BAR04448.1				Glyco_hyd_65N_2 superfamily	superfamily	405224	3	249	1.38e-36	cl22392	Alpha-L-Fuco	Family	1	771	IPR016518
			Bifidobacterium longum subsp. infantis ATCC 15697 = JCM 1222 = DSM 20088	α-1,2-L-fucosidase (Blon_2335)	782	ACJ53393.1			Fucα1,2/3 Gal (2)	Glyco_hyd_65N_2 superfamily	superfamily	405224	3	249	1.5e-34	cl22392	Alpha-L-Fuco	Family	1	772	IPR016518
			Bifidobacterium longum subsp. infantis ATCC 15697 = JCM 1222 = DSM 20088	BLIJ_2412	782	BAJ69989.1				Glyco_hyd_65N_2 superfamily	superfamily	405224	3	249	1.5e-34	cl22392	Alpha-L-Fuco	Family	1	772	IPR016518
			Bifidobacterium longum subsp. infantis Bi-26	EE567_010600	782	QKY14189.1				Glyco_hyd_65N_2 superfamily	superfamily	405224	3	249	3.63104e-28	cl22392	Alpha-L-Fuco	Family	1	772	IPR016518
			Bifidobacterium longum subsp. infantis BT1	RY67_475	782	ALE08538.1				Glyco_hyd_65N_2 superfamily	superfamily	405224	3	249	6.35681e-27	cl22392	Alpha-L-Fuco	Family	1	771	IPR016518
			Bifidobacterium longum subsp. infantis JCM 11347	BL1347_12480	782	QOL44540.1				Glyco_hyd_65N_2 superfamily	superfamily	405224	3	249	7.38646e-29	cl22392	Alpha-L-Fuco	Family	1	771	IPR016518
			Bifidobacterium longum subsp. infantis JCM 7009	BLI009_01390	782	QSP97853.1				Glyco_hyd_65N_2 superfamily	superfamily	405224	3	249	1.09737e-28	cl22392	Alpha-L-Fuco	Family	1	771	IPR016518
			Bifidobacterium longum subsp. infantis JCM 7010	BLI010_08110	782	QTB92447.1				Glyco_hyd_65N_2 superfamily	superfamily	405224	3	249	1.09737e-28	cl22392	Alpha-L-Fuco	Family	1	771	IPR016518
			Bifidobacterium longum subsp. infantis JCM 7011	BLI011_01350	782	QSZ18100.1				Glyco_hyd_65N_2 superfamily	superfamily	405224	3	249	1.09737e-28	cl22392	Alpha-L-Fuco	Family	1	771	IPR016518
			Bifidobacterium longum subsp. infantis NCTC11817	NCTC11817_02481	782	VEG44481.1				Glyco_hyd_65N_2 superfamily	superfamily	405224	3	249	1.50009e-29	cl22392	Alpha-L-Fuco	Family	1	772	IPR016518
		Characterized fucosidases in bold type
		(1) Gotoh et al., 2018; Katayama et al. 2004; Nagae et al., 2007 [17,18,34]
		(2) Sela et al., 2012 [21]
		† Lu et al., 2020 [49]
		‡ Blum et al., 2021 [50]
