# Supplementary material for: Architecture Insight of Bifidobacterial α-L-Fucosidases
Source: Preprints.org preprint supplement (doi:10.20944/preprints202106.0736.v1), 2021-06-30
Supplement: Supplementary file 3 [file Table 3 Supplemental.xlsx]

## Sheet: GH151
											NCBI CDD DATABASE†							INTERPRO DATABASE‡
				Organism	Protein name	Size (Aminoacids)	Genbank	Signal peptide (region)	Transmembrane helices (region)	Activity	Conserved Domain	Hit type	PSSM-ID	From	To	E-Value	Accession	Conserved Domain	Hit type	From	To	Accession
				Bifidobacterium longum subsp. infantis ATCC 15697 = JCM 1222 = DSM 20088	BLIJ_0353	674	BAJ67947.1				AmyAc_family superfamily	superfamily	422958	31	170	8.96e-39	cl38930	GHL6	Family	31	170	IPR028212
											A4_beta-galactosidase_middle_domain	specific	153237	382	493	4.62e-10	cd03143	Beta_galactosidase_Trimer	Domain	380	437	IPR013738
											GanA superfamily	superfamily	224786	56	436	0.000329	cl34369
				Bifidobacterium longum subsp. infantis ATCC 15697 = JCM 1222 = DSM 20088	α-L-fucosidase (Blon_0346)	674	ACJ51470.1			Fucα1,2 Gal (1)	AmyAc_family superfamily	superfamily	422958	31	170	8.96e-39	cl38930	GHL6	Family	31	170	IPR028212
											A4_beta-galactosidase_middle_domain	specific	153237	382	493	4.62e-10	cd03143	Beta_galactosidase_Trimer	Domain	380	437	IPR013738
											GanA superfamily	superfamily	224786	56	436	0.000329	cl34369
				Bifidobacterium longum subsp. infantis JCM 11347	BL1347_02535	674	QOL44971.1				AmyAc_family superfamily	superfamily	422958	31	170	1.97815e-35	cl38930	GHL6	Family	31	170	IPR028212
											A4_beta-galactosidase_middle_domain	specific	153237	382	493	4.36787e-05	cd03143	Beta_galactosidase_Trimer	Domain	380	437	IPR013738
											GanA superfamily	superfamily	224786	56	436	0.00461	cl34369
				Bifidobacterium longum subsp. infantis JCM 11347	BL1347_03185	674	QOL45072.1				AmyAc_family superfamily	superfamily	422958	31	170	1.94966e-33	cl38930	GHL6	Family	31	170	IPR028212
											A4_beta-galactosidase_middle_domain	specific	153237	382	493	3.7096e-06	cd03143	Beta_galactosidase_Trimer	Domain	380	437	IPR013738
				Bifidobacterium longum subsp. infantis JCM 7009	BLI009_04220	674	QSP98323.1				AmyAc_family superfamily	superfamily	422958	31	170	4.32161e-33	cl38930	GHL6	Family	31	170	IPR028212
											A4_beta-galactosidase_middle_domain	specific	153237	382	493	5.55376e-05	cd03143	Beta_galactosidase_Trimer	Domain	380	437	IPR013738
				Bifidobacterium longum subsp. infantis JCM 7010	BLI010_05285	674	QTB93904.1				AmyAc_family superfamily	superfamily	422958	31	170	4.32161e-33	cl38930	GHL6	Family	31	170	IPR028212
											A4_beta-galactosidase_middle_domain	specific	153237	382	493	5.55376e-05	cd03143	Beta_galactosidase_Trimer	Domain	380	437	IPR013738
				Bifidobacterium longum subsp. infantis JCM 7011	BLI011_04185	674	QSZ18571.1				AmyAc_family superfamily	superfamily	422958	31	170	4.32161e-33	cl38930	GHL6	Family	31	170	IPR028212
											A4_beta-galactosidase_middle_domain	specific	153237	382	493	5.55376e-05	cd03143	Beta_galactosidase_Trimer	Domain	380	437	IPR013738
				Bifidobacterium longum subsp. infantis NCTC11817	NCTC11817_00358 (Lacz_2)	674	VEG40231.1				AmyAc_family superfamily	superfamily	422958	30	169	9.27492e-34	cl38930	GHL6	Family	30	169	IPR028212
											A4_beta-galactosidase_middle_domain	specific	153237	381	492	4.75424e-05	cd03143	Beta_galactosidase_Trimer	Domain	379	436	IPR013738
											GanA superfamily	superfamily	224786	55	435	0.000343	cl34369
				Characterized fucosidases in bold type
				(1) Sela et al., 2012 [21]
				† Lu et al., 2020 [49]
				‡ Blum et al., 2021 [50]
